# Supplementary material for: Purification, Characterization and in vitro Evaluation of Polymyxin A From Paenibacillus dendritiformis: An Underexplored Member of the Polymyxin Family
Source: PubMed Central journal article supplement (PMC6265310; doi:10.3389/fmicb.2018.02864), 2018-11-23
Supplement: Data_Sheet_1.pdf [file Data_Sheet_1.pdf]

## **Purification, characterization and *in vitro* evaluation of polymyxin A from *Paenibacillus dendritiformis*: An underexplored member of the polymyxin family**

Manoj Jangra<sup>1</sup>, Harmandeep Kaur Randhawa<sup>1</sup>, Manpreet Kaur<sup>1</sup>, Anugya Srivastava<sup>1</sup>, Navdezda Maurya<sup>1</sup>, Prashant P Patil<sup>2</sup>, Pallavi Jaswal<sup>3</sup>, Ashish Arora<sup>4</sup>, Prabhu B Patil<sup>2</sup>, Manoj Raje<sup>3</sup>, Hemraj Nandanwar<sup>1\*</sup>

<sup>1</sup>Clinical Microbiology & Bioactive Screening Laboratory, CSIR-Institute of Microbial Technology, Sector -39A, Chandigarh, India

<sup>2</sup>Bacterial Genetics & Genomics Laboratory, CSIR-Institute of Microbial Technology, Sector -39A, Chandigarh, India

<sup>3</sup>Cell Biology and Microscopy Laboratory, CSIR-Institute of Microbial Technology, Sector -39A, Chandigarh, India

<sup>4</sup> Molecular and Structural Biology Division, CSIR-Central Drug Research Institute, Mahatma Gandhi Marg, Lucknow, India

### **\*Address for correspondence**

Dr. Hemraj Nandanwar

CSIR - Institute of Microbial Technology, Sector -39A, Chandigarh, India, 160036

E-mail: [hemraj@imtech.res.in](mailto:hemraj@imtech.res.in)

Telephone: +91-172-6665338    Fax: +91-172-2690585/2690632

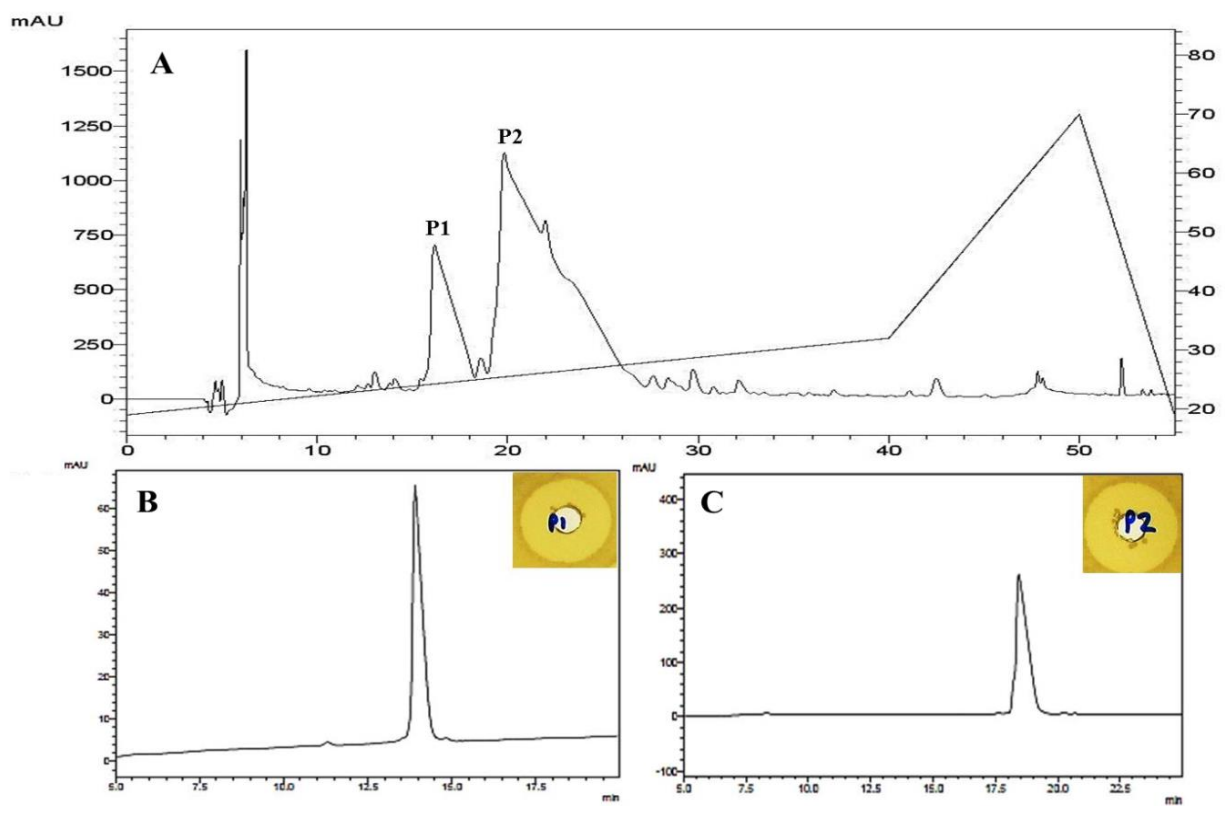

**Supplementary Figure S1** (A) HPLC profile of cation dialysate. (B) Peak 1 and (C) Peak 2 purified. Insets show the antimicrobial activity of both compounds

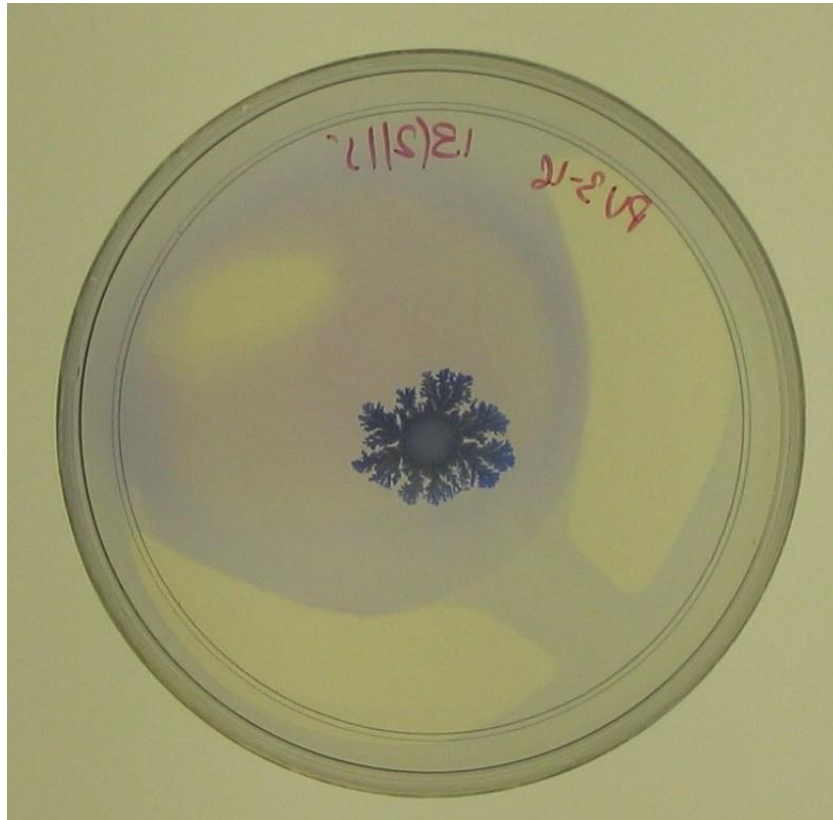

**Supplementary Figure S2** Appearance of colony of PV3-16 strain in tip-splitting pattern on 1.5% agar medium containing 0.2% peptone. 5 $\mu$ l log-phase culture was spotted and incubated at 37 °C. The plate shown here is after 3-days incubation and then stained with crystal violet dye to visualize the patterns

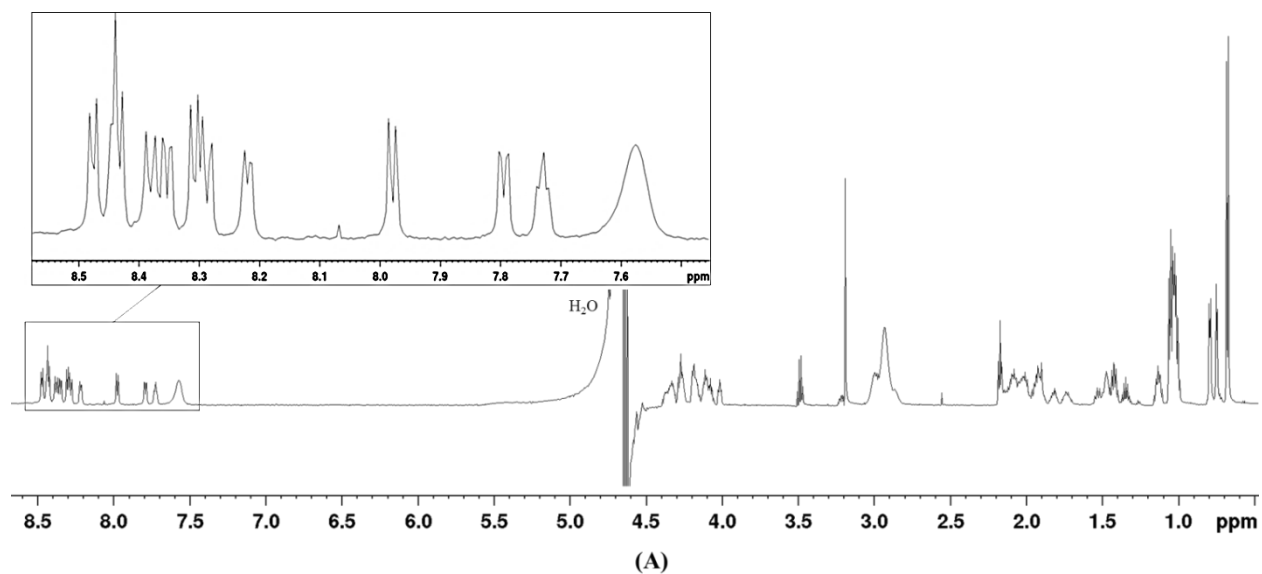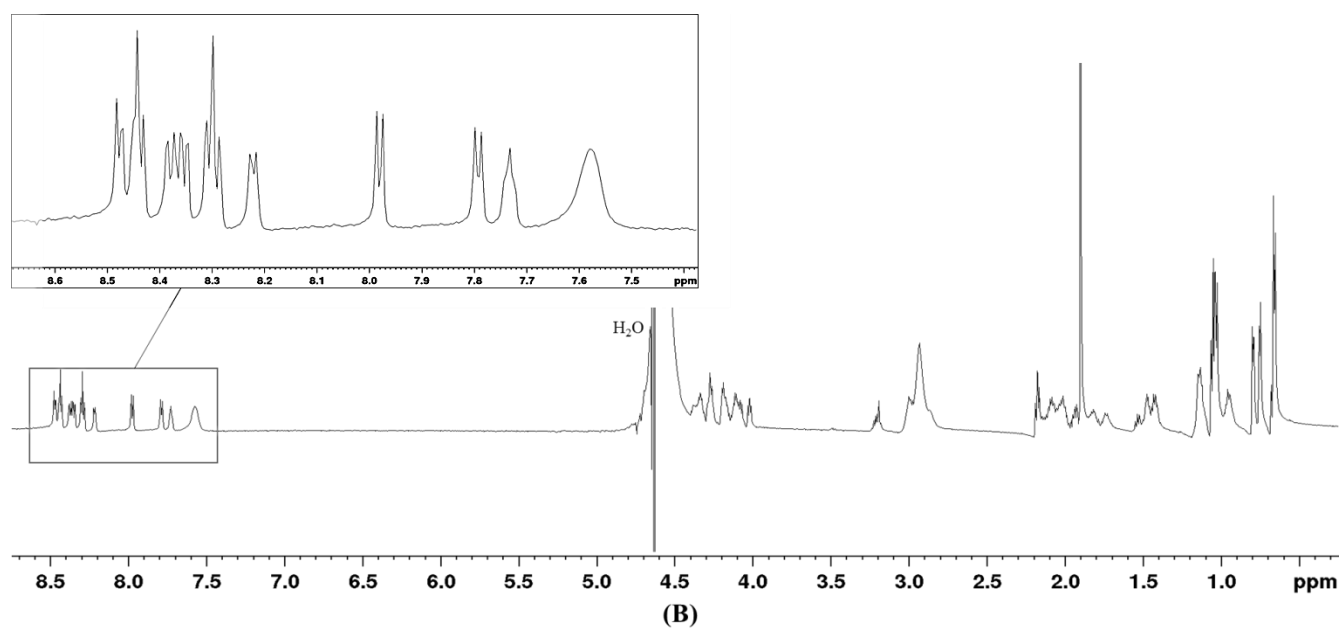

**Supplementary Figure S3** One dimensional <sup>1</sup>H NMR spectra of peak1 (A) and peak 2 (B) with the expansion of amide region

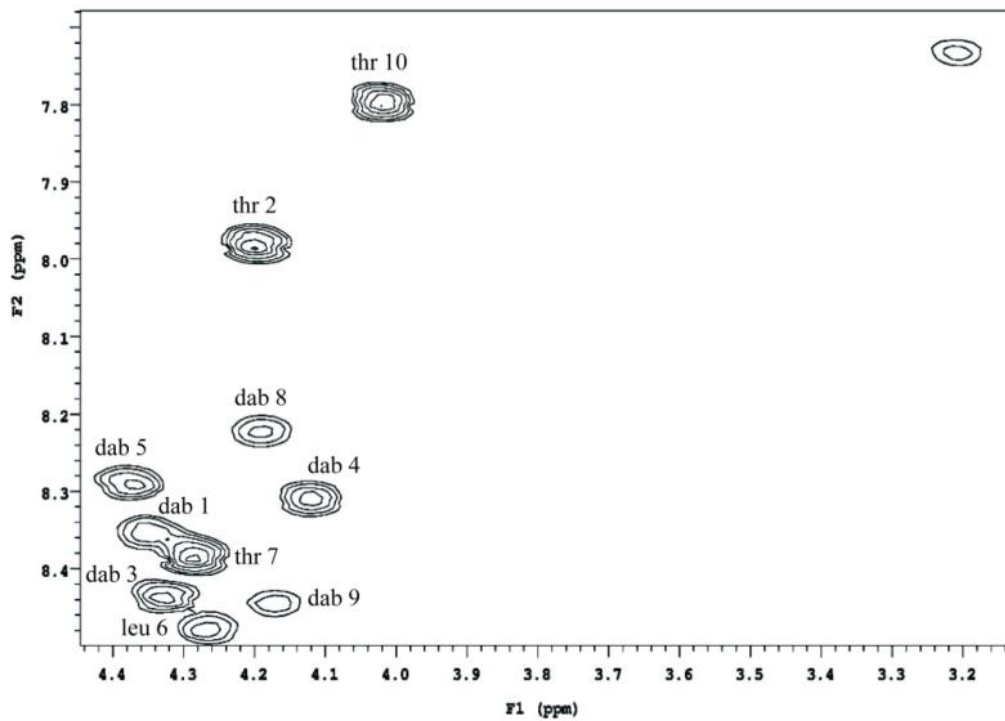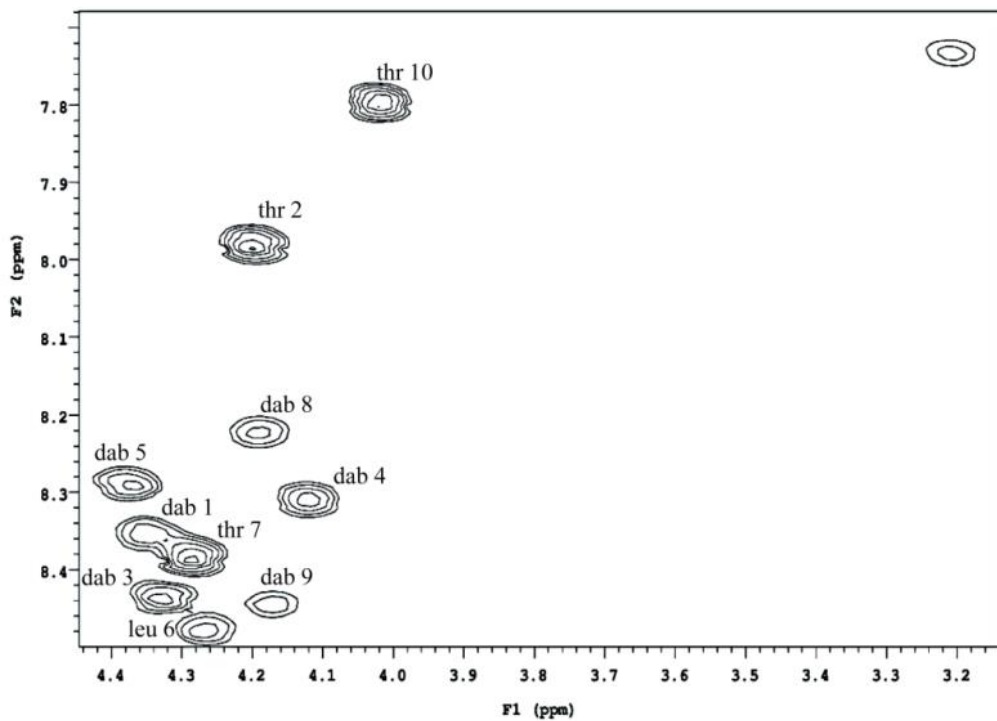

**Supplementary Figure S4** HH-COSY showing the  $\alpha$ -H/amide-H correlations. Upper panel (P 1) and lower panel (P 2)

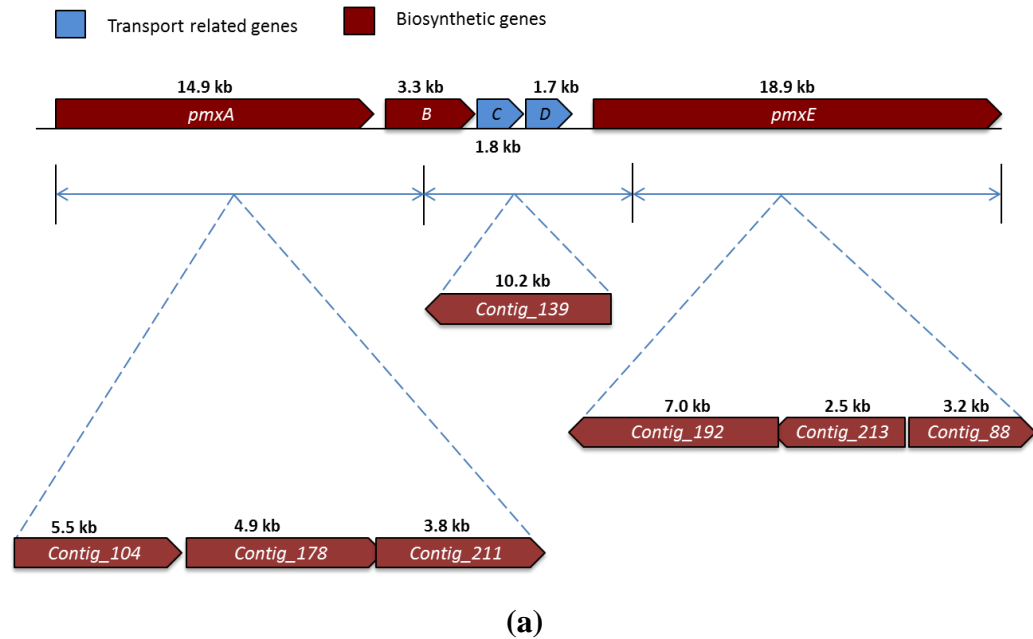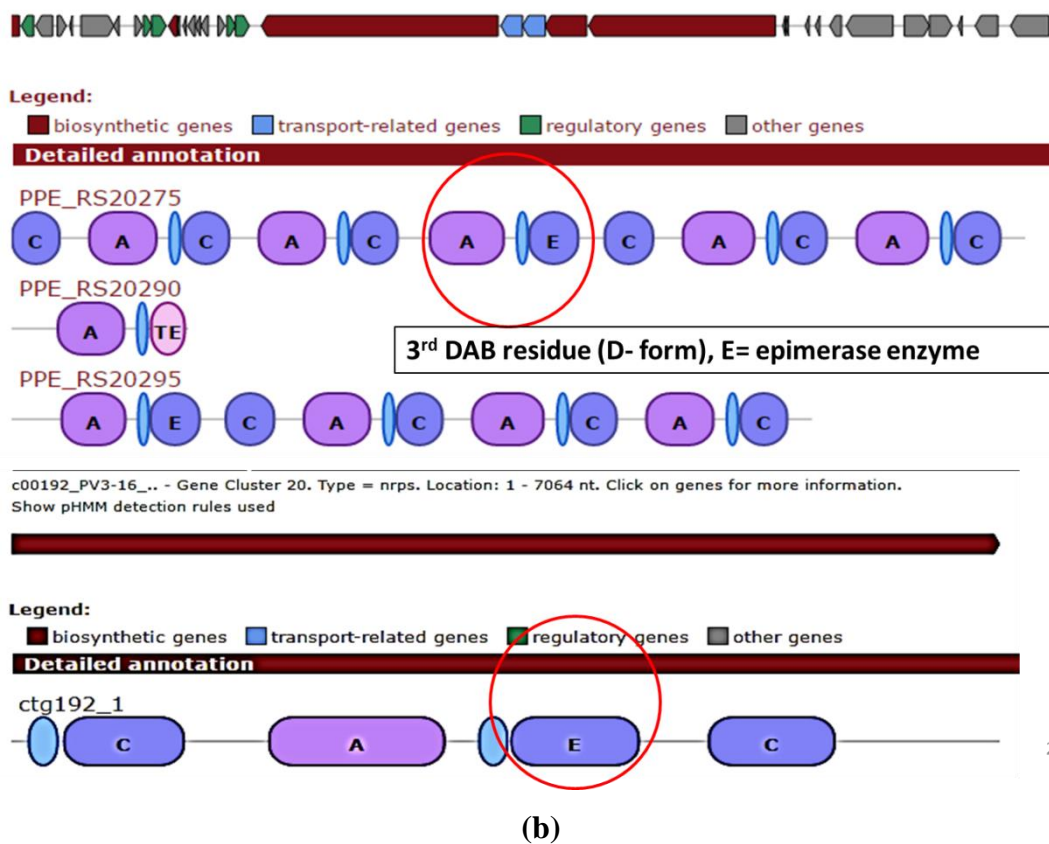

**Supplementary Figure S5** Biosynthetic gene cluster for polymyxin A. (a) Upper panel shows the polymyxin gene cluster reported in the literature by Choi et al. Gene cluster in PV3-16 strain is dispersed in seven contigs. (b) Detailed annotation of PmxE gene showing gene for epimerase enzyme responsible for incorporation of D-Dab at third position. 4

**Supplementary Table-S1** Antibiotic-susceptibility pattern of clinical isolates

| <b>Clinical isolate</b> | <b>CAZ 30</b> | <b>TE 30</b> | <b>AK 30</b> | <b>PI 100</b> | <b>S 10</b> | <b>FO 200</b> | <b>NIT 300</b> | <b>CTX 30</b> | <b>CIP 5</b> | <b>NX 10</b> | <b>CXM 30</b> | <b>TR 5</b> | <b>CFM 5</b> | <b>AMC 30</b> | <b>PIT 100/10</b> | <b>A/S 10/10</b> |
|-------------------------|---------------|--------------|--------------|---------------|-------------|---------------|----------------|---------------|--------------|--------------|---------------|-------------|--------------|---------------|-------------------|------------------|
| 3185                    | 0<br>R        | 10<br>R      | 21<br>S      | 0<br>R        | 20<br>S     | 34<br>S       | 22<br>S        | 0<br>R        | 0<br>R       | 10<br>R      | 0<br>R        | 0<br>R      | 0<br>R       | 10<br>R       | 18<br>I           | 12<br>I          |
| 7932                    | 13<br>R       | 9<br>R       | 20<br>S      | 9<br>R        | 22<br>S     | 31<br>S       | 19<br>S        | 10<br>R       | 8<br>R       | 9<br>R       | 0<br>R        | 0<br>R      | 0<br>R       | 10<br>R       | 26<br>S           | 14<br>I          |
| 14504                   | 17<br>R       | 0<br>R       | 20<br>S      | 13<br>R       | 11<br>R     | 31<br>S       | 20<br>S        | 9<br>R        | 0<br>R       | 11<br>R      | 0<br>R        | 0<br>R      | 0<br>R       | 12<br>R       | 27<br>S           | 14<br>I          |
| 14363                   | 0<br>R        | 10<br>R      | 27<br>S      | 7<br>R        | 15<br>S     | 34<br>S       | 23<br>S        | 0<br>R        | 13<br>R      | 11<br>R      | 0<br>R        | 0<br>R      | 0<br>R       | 10<br>R       | 24<br>S           | 13<br>I          |
| 9062                    | 9<br>R        | 15<br>R      | 19<br>S      | 0<br>R        | 18<br>S     | 34<br>S       | 23<br>S        | 0<br>R        | 0<br>R       | 9<br>R       | 0<br>R        | 0<br>R      | 0<br>R       | 0<br>R        | 20<br>I           | 11<br>R          |
| 7210                    | 16<br>R       | 0<br>R       | 21<br>S      | 12<br>R       | 18<br>R     | 36<br>S       | 22<br>S        | 11<br>R       | 0<br>R       | 5<br>R       | 0<br>R        | 0<br>R      | 0<br>R       | 12<br>R       | 27<br>S           | 16<br>S          |
| 7534                    | 16<br>R       | 16<br>R      | 21<br>S      | 16<br>R       | 11<br>R     | 31<br>S       | 16<br>I        | 15<br>R       | 0<br>R       | 12<br>R      | 0<br>R        | 0<br>R      | 0<br>R       | 12<br>R       | 25<br>S           | 17<br>S          |
| 13425                   | 0<br>R        | 15<br>R      | 27<br>S      | 8<br>R        | 0<br>R      | 37<br>S       | 23<br>S        | 10<br>R       | 13<br>R      | 11<br>R      | 0<br>R        | 31<br>S     | 21<br>S      | 11<br>R       | 23<br>S           | 13<br>I          |
| 14084                   | 13<br>R       | 13<br>R      | 26<br>S      | 11<br>R       | 22<br>R     | 40<br>S       | 28<br>S        | 15<br>R       | 12<br>R      | 10<br>R      | 0<br>R        | 0<br>R      | 0<br>R       | 17<br>I       | 31<br>S           | 17<br>S          |
| GMCH16                  | 0<br>R        | 11<br>R      | 0<br>R       | 0<br>R        | 22<br>S     | 23<br>S       | 8<br>R         | 8<br>R        | 10<br>R      | 0<br>R       | 0<br>R        | 0<br>R      | 0<br>R       | 0<br>R        | 12<br>R           | 0<br>R           |
| GMCH10                  | 0<br>R        | 11<br>R      | 9<br>R       | 0<br>R        | 0<br>R      | 18<br>S       | 10<br>R        | 0<br>R        | 14<br>R      | 17<br>S      | 0<br>R        | 0<br>R      | 0<br>R       | 0<br>R        | 13<br>R           | 0<br>R           |
| 1573                    | 0<br>R        | 22<br>S      | 0<br>R       | 0<br>R        | 19<br>S     | 24<br>S       | 11<br>R        | 0<br>R        | 9<br>R       | 0<br>R       | 0<br>R        | 0<br>R      | 0<br>R       | 0<br>R        | 0<br>R            | 0<br>R           |
| GMCH13                  | 13<br>R       | 10<br>R      | 22<br>S      | 9<br>R        | 9<br>R      | 10<br>R       | 11<br>R        | 13<br>R       | 10<br>R      | 10<br>R      | 0<br>R        | 0<br>R      | 0<br>R       | 9<br>R        | 17<br>R           | 13<br>I          |
| GMCH12                  | 0<br>R        | 0<br>R       | 0<br>R       | 0<br>R        | 22<br>S     | 23<br>S       | 9<br>R         | 0<br>R        | 11<br>R      | 12<br>R      | 0<br>R        | 0<br>R      | 0<br>R       | 0<br>R        | 0<br>R            | 0<br>R           |
| 1428                    | 0<br>R        | 24<br>S      | 0<br>R       | 9<br>R        | 0<br>R      | 26<br>S       | 14<br>R        | 0<br>R        | 12<br>R      | 13<br>I      | 0<br>R        | 0<br>R      | 0<br>R       | 0<br>R        | 13<br>R           | 0<br>R           |
| GMCH04                  | 0<br>R        | 17<br>S      | 0<br>R       | 0<br>R        | 12<br>I     | 16<br>S       | 0<br>R         | 0<br>R        | 0<br>R       | 0<br>R       | 0<br>R        | 0<br>R      | 0<br>R       | 0<br>R        | 0<br>R            | 0<br>R           |
| GMCH11                  | 0<br>R        | 22<br>S      | 0<br>R       | 0<br>R        | 12<br>I     | 18<br>S       | 11<br>R        | 0<br>R        | 0<br>R       | 0<br>R       | 0<br>R        | 28<br>S     | 0<br>R       | 0<br>R        | 10<br>R           | 0<br>R           |
| 827                     | 0<br>R        | 19<br>S      | 0<br>R       | 0<br>R        | 20<br>S     | 22<br>S       | 0<br>R         | 0<br>R        | 15<br>R      | 13<br>I      | 0<br>R        | 27<br>S     | 0<br>R       | 0<br>R        | 0<br>R            | 0<br>R           |
| B8                      | 0<br>R        | 25<br>S      | 0<br>R       | 0<br>R        | 12<br>I     | 23<br>S       | 13<br>R        | 0<br>R        | 11<br>R      | 12<br>R      | 0<br>R        | 0<br>R      | 0<br>R       | 0<br>R        | 0<br>R            | 0<br>R           |
| GMCH18                  | 0<br>R        | 36<br>S      | 13<br>R      | 0<br>R        | 0<br>R      | 24<br>S       | 0<br>R         | 0<br>R        | 0<br>R       | 12<br>R      | 0<br>R        | 18<br>S     | 0<br>R       | 10<br>R       | 13<br>R           | 18<br>S          |
| GMCH05                  | 9<br>R        | 0<br>R       | 13<br>R      | 0<br>R        | 0<br>R      | 19<br>S       | 0<br>R         | 0<br>R        | 14<br>R      | 17<br>S      | 0<br>R        | 0<br>R      | 0<br>R       | 0<br>R        | 12<br>R           | 15<br>S          |
| GMCH 14                 | 9<br>R        | 0<br>R       | 12<br>R      | 0<br>R        | 0<br>R      | 25<br>S       | 0<br>R         | 0<br>R        | 15<br>R      | 21<br>S      | 0<br>R        | 0<br>R      | 0<br>R       | 14<br>I       | 17<br>R           | 22<br>S          |
| GMCH06                  | 0<br>R        | 11<br>R      | 0<br>R       | 10<br>R       | 26<br>S     | 29<br>S       | 0<br>R         | 16<br>R       | 0<br>R       | 0<br>R       | 0<br>R        | 0<br>R      | 0<br>R       | 10<br>R       | 17<br>R           | 0<br>R           |

| <b>Clinical isolate</b> | <b>CAZ 30</b> | <b>TE 30</b> | <b>AK 30</b> | <b>PI 100</b> | <b>S 10</b> | <b>FO 200</b> | <b>NIT 300</b> | <b>CTX 30</b> | <b>CIP 5</b> | <b>NX 10</b> | <b>CXM 30</b> | <b>TR 5</b> | <b>CFM 5</b> | <b>AMC 30</b> | <b>PIT 100/10</b> | <b>A/S 10/10</b> |
|-------------------------|---------------|--------------|--------------|---------------|-------------|---------------|----------------|---------------|--------------|--------------|---------------|-------------|--------------|---------------|-------------------|------------------|
| PA1                     | 0<br>R        | ND           | 10<br>R      | 16<br>R       | ND          | ND            | 0<br>R         | 11<br>R       | 0<br>R       | 11<br>R      | 0<br>R        | ND          | ND           | ND            | 17<br>R           | ND               |
| PA2                     | 0<br>R        | ND           | 10<br>S      | 16<br>R       | ND          | ND            | 0<br>R         | 22<br>S       | 0<br>R       | 10<br>R      | 0<br>R        | ND          | ND           | ND            | 17<br>R           | ND               |
| PA3                     | 31<br>S       | ND           | 22<br>S      | 32<br>S       | ND          | ND            | 10<br>R        | 29<br>S       | 19<br>R      | 28<br>S      | 21<br>R       | ND          | ND           | ND            | 36<br>S           | ND               |
| PA4                     | 31<br>S       | ND           | 13<br>R      | 28<br>S       | ND          | ND            | 0<br>R         | 26<br>S       | 11<br>R      | 0<br>R       | 20<br>S       | ND          | ND           | ND            | 27<br>S           | ND               |
| PA5                     | 0<br>R        | ND           | 0<br>R       | 16<br>R       | ND          | ND            | 0<br>R         | 12<br>R       | 10<br>R      | 10<br>R      | 0<br>R        | ND          | ND           | ND            | 17<br>R           | ND               |
| PA6                     | 32<br>S       | ND           | 33<br>S      | 30<br>S       | ND          | ND            | 0<br>R         | 30<br>S       | 20<br>S      | 32<br>S      | 24<br>S       | ND          | ND           | ND            | 31<br>S           | ND               |

The results were observed as zone of inhibition around the disc as denoted by the value in the boxes. R= Resistant; S= Sensitive; I= Intermediate; ND=not determined

|                      |                         |
|----------------------|-------------------------|
| <b>CAZ 30 µg</b>     | Ceftazidime             |
| <b>TE 30 µg</b>      | Tetracycline            |
| <b>AK 30 µg</b>      | Amikacin                |
| <b>PI 100 µg</b>     | Piperacillin            |
| <b>S 10 µg</b>       | Streptomycin            |
| <b>FO 200 µg</b>     | Fosfomycin              |
| <b>NIT 300 µg</b>    | Nitrofurantoin          |
| <b>CTX 30 µg</b>     | Cefotaxime              |
| <b>CIP 5 µg</b>      | Ciprofloxacin           |
| <b>NX 10 µg</b>      | Norfloxacin             |
| <b>CXM 30 µg</b>     | Cefuroxime              |
| <b>TR 5 µg</b>       | Trimethoprim            |
| <b>CFM 5 µg</b>      | Cefixime                |
| <b>AMC 30 µg</b>     | Amoxyclav               |
| <b>PIT 100/10 µg</b> | Piperacillin/Tazobactam |
| <b>A/S 10/10 µg</b>  | Ampicillin/Sulbactam    |
